# Supplementary material for: Selective activation of FZD7 promotes mesendodermal differentiation of human pluripotent stem cells
Source: eLife. 2020 Dec 17;9:e63060. doi: 10.7554/eLife.63060 (PMC7759383; doi:10.7554/eLife.63060)
Supplement: Figure 2—source data 1. [file elife-63060-fig2-data1.xlsx]

## Sheet: Fig.2B
LUCIFERASE ASSAY
Treatment	STF activity (relative light units)
	Rep 1	Rep 2	Rep 3	Rep 4	Rep 5	Rep 6	Rep 7	Rep 8
Mock	49	44	36	34	34	26	52	34
Wnt3a	1214	1083	1299	1306	975	984	1080	888
F7	42	28	32	32	25	18	30	28
L6	47	95	25	38	25	23	22	37
F7L6	7387	8105	6234	10526	7278	6100	8190	7809

## Sheet: Fig.2C
LUCIFERASE ASSAY
			Relative light units (RLU)
Treatment	[F7L6]	RSPO?	Rep 1	Rep 2	Rep 3
F7L6	10nM		4531	4431	3341
F7L6	3nM		4271	1760	3961
F7L6	1nM		5491	4551	4551
F7L6	0.3nM		2730	3671	4511
F7L6	0.1nM		680	1540	870
F7L6	0.03nM		280	180	660
F7L6	0.01nM		320	370	280
None	0nM		210	160	190
F7L6	10nM	RSPO	98080	101200	115900
F7L6	3nM	RSPO	196300	130500	131800
F7L6	1nM	RSPO	127000	47990	113900
F7L6	0.3nM	RSPO	94320	134400	104700
F7L6	0.1nM	RSPO	29110	52700	46380
F7L6	0.03nM	RSPO	8944	15690	14070
F7L6	0.01nM	RSPO	4071	4311	5021
None	0nM	RSPO	3951	3160	1700

## Sheet: Fig.2D
LUCIFERASE ASSAY
	STF activity (relative light units)
Treatment	FZD7					CRD-less FZD7 STF
	Rep 1	Rep 2	Rep 3	Rep 4	Rep 5	Rep 1	Rep 2	Rep 3	Rep 4	Rep 5
Mock	4529	1082	1482	2625	1889	80	190	353	203	101
Wnt3a	256388	149903	158548	159207	200907	169	257	125	322	151
F7L6	165589	206834	193039	153421	153431	16327	21214	15609	9398	10357

## Sheet: Fig.2E
LUCIFERASE ASSAY
	STF activity (relative light units)
Treatment	Untransfected				FZD2				FZD2-8aa
	Rep 1	Rep 2	Rep 3	Rep 4	Rep 1	Rep 2	Rep 3	Rep 4	Rep 1	Rep 2	Rep 3	Rep 4
Mock	72	249	72	41	244	293	345	396	804	250	679	204
Wnt3a	653	445	422	418	13158	11631	13529	13496	16108	11010	14113	14348
F7L6	79	70	73	155	346	376	322	270	2426	3975	3254	3821

## Sheet: Fig.2H
SP5 expression in H1
	SP5 Cq
nM	F7L6			Wnt3a
	Rep 1	Rep 2	Rep 3	Rep 1	Rep 2	Rep 3
0	36.0093	39.3577	37.4457	36.0093	39.3577	37.4457
2	30.97	30.85	30.52	31.6559	31.1322	30.6904
4	31.0438	31.2112	30.6579	30.3362	30.1899	30.3438
6	30.6697	30.2539	30.7782	30.2338	30.1212	30.2925
8	30.253	30.6061	30.6327	30.5201	30.813	30.493
10	30.253	30.4596	30.1983	30.844	30.395	29.9221
12	30.4787	30.7743	30.368	30.7126	30.8505	30.8785
16	30.0944	30.3442	30.0961	29.8731	30.2032	29.7757
20	30.0766	30.0722	29.6189	30.0293	30.1901	29.7424
	RPL13A Cq (loading control)
nM	F7L6			Wnt3a
	Rep 1	Rep 2	Rep 3	Rep 1	Rep 2	Rep 3
0	19.3208	19.2544	19.1143	19.3208	19.2544	19.1143
2	19.6	19.93	19.88	19.5753	19.7566	19.6331
4	20.2868	20.1908	20.1939	19.1082	19.1223	19.0134
6	19.7145	19.8944	19.9574	19.0471	19.0273	19.0965
8	19.9884	19.9115	19.8294	19.2836	19.3783	19.524
10	19.8432	19.5585	19.6348	19.2719	19.4593	19.7089
12	20.0889	19.8396	19.9687	20.3738	20.2005	20.0314
16	19.5895	19.5677	19.5677	19.3587	19.3024	19.2119
20	19.1523	19.0321	19.1168	19.2811	19.3044	19.1951

## Sheet: Fig.2I
LUCIFERASE ASSAY
		Relative light units (RLU)
Treatment	Concentration	Rep 1	Rep 2	Rep 3
Rspo only		2430	1210	620
F7L6	50nM	60480	55190	41400
F7L6	20nM	56100	61670	57480
F7L6	10nM	47860	68880	76100
F7L6	5nM	66590	54790	54710
F7L6	2nM	61710	49540	53270
F7L6	1nM	55360	52780	52290
F7L6	0.5nM	41650	43720	46720
F7L6	0.2nM	35820	42320	27670
F7L6	0.1nM	28190	19870	22090
F7L6	0.05nM	15200	15980	16450
F7L6	0.02nM	5511	6212	6642
F7L6	0.01nM	5321	4381	3431
F7L6	0.005nM	1840	1280	2150
F7L6	0.002nM	1160	1340	870
F7L6	0.001nM	1690	900	1160
F7L6-sc	50nM	17600	20230	18460
F7L6-sc	20nM	23400	7182	26730
F7L6-sc	10nM	30230	33680	25520
F7L6-sc	5nM	28830	29270	33340
F7L6-sc	2nM	33210	34390	29800
F7L6-sc	1nM	28890	39490	31110
F7L6-sc	0.5nM	27980	24730	24930
F7L6-sc	0.2nM	20920	19180	23690
F7L6-sc	0.1nM	18940	12990	13810
F7L6-sc	0.05nM	7893	6912	7192
F7L6-sc	0.02nM	3090	3200	2920
F7L6-sc	0.01nM	2200	1970	2440
F7L6-sc	0.005nM	2300	1390	1640
F7L6-sc	0.002nM	1130	1080	860
F7L6-sc	0.001nM	1170	820	690
Rspo only		1070	1030	1820

## Sheet: Fig2-fig.supp1
LUCIFERASE ASSAY
			Relative light units (RLU)
Treatment	Concentration	RSPO?	Rep 1	Rep 2	Rep3
FLAg-FP+P-L61+3	50nM		53750	45050	42730
FLAg-FP+P-L61+3	20nM		36430	40000	41800
FLAg-FP+P-L61+3	10nM		47240	47380	40100
FLAg-FP+P-L61+3	5nM		44810	41930	44210
FLAg-FP+P-L61+3	2nM		34890	36450	40900
FLAg-FP+P-L61+3	1nM		36250	41590	42010
FLAg-FP+P-L61+3	0.5nM		39140	33580	30570
FLAg-FP+P-L61+3	0.2nM		17960	20580	17930
FLAg-FP+P-L61+3	0.1nM		10110	10580	10990
FLAg-FP+P-L61+3	0.05nM		3621	3200	3691
None			150	190	200
FLAg-FP+P-L61+3	50nM	RSPO	139700	89940	109400
FLAg-FP+P-L61+3	20nM	RSPO	126700	102100	106200
FLAg-FP+P-L61+3	10nM	RSPO	116200	98800	97380
FLAg-FP+P-L61+3	5nM	RSPO	93880	96680	96400
FLAg-FP+P-L61+3	2nM	RSPO	99840		94120
FLAg-FP+P-L61+3	1nM	RSPO	94700	112400	105800
FLAg-FP+P-L61+3	0.5nM	RSPO	120100	98680	91450
FLAg-FP+P-L61+3	0.2nM	RSPO	109900	78380	74090
FLAg-FP+P-L61+3	0.1nM	RSPO	79020	65520	66270
FLAg-FP+P-L61+3	0.05nM	RSPO	59720	71990	82120
Rspo only		RSPO	1240	1200	950
			Relative light units (RLU)
Treatment	Concentration	RSPO?	Rep 1	Rep 2	Rep3
None			280	150	120
Wnt3a	50nM		52480	75210	76580
Wnt3a	20nM		30780	47450	42150
Wnt3a	10nM		24980	28690	31410
Wnt3a	5nM		13220	12920	11510
Wnt3a	2nM		2170	270	2580
Wnt3a	1nM		710	640	670
Wnt3a	0.5nM		390	260	260
Wnt3a	0.2nM		140	290	220
Wnt3a	0.1nM		120	30	160
Wnt3a	0.05nM		230	290	260
Rspo only		RSPO	1140	650	910
Wnt3a	50nM	RSPO	126200	109400	103800
Wnt3a	20nM	RSPO	95500	86280	83830
Wnt3a	10nM	RSPO	71240	75020	78070
Wnt3a	5nM	RSPO	55200	51060	42500
Wnt3a	2nM	RSPO	29090	21330	31580
Wnt3a	1nM	RSPO	12210	13200	11120
Wnt3a	0.5nM	RSPO	5181	6732	9174
Wnt3a	0.2nM	RSPO	3451	3070	2250
Wnt3a	0.1nM	RSPO	2730	1670	1500
Wnt3a	0.05nM	RSPO	1030	1150	1210

## Sheet: Fig2-fig.supp2
SP5 expression in H9
	SP5 Cq
nM	F7L6				Wnt3a
	Rep 1	Rep 2	Rep 3		Rep 1	Rep 2	Rep 3
0	37.5534	37.1148	37.964		37.5534	37.1148	37.964
2	27.9987	27.8728	27.9341		30.097	30.0776	30.2121
4	27.4635	27.4558	27.4399		29.1727	29.2785	29.2734
6	28.6385	28.6446	28.6147		30.3657	30.3051	30.3735
8	29.0757	28.7836	28.7809		29.0852	29.0665	29.0399
10	26.7471	26.7683	26.7224		27.9072	27.9143	27.8775
12	26.6515	26.9099	26.6965		28.36	28.4288	28.3672
16	28.5309	28.6267	28.5182		27.907	27.7962	27.8227
20	26.3833	26.3694	26.5032		27.7625	27.78	27.7862
	RPL13A Cq (loading control)
nM	F7L6				Wnt3a
	Rep 1	Rep 2	Rep 3	Rep 4	Rep 1	Rep 2	Rep 3	Rep 4
0	19.092	19.3004	19.2751	19.3506	18.8044	18.7755	18.7881	18.7491
2	19.0632	19.0791	19.0125	19.1171	18.8146	18.9212	18.9347	19.0204
4	19.1315	19.2407	19.308	19.0404	18.8553	19.0875	19.2961	18.9258
6	19.6067	19.691	19.7895	19.5095	20.0609	20.1555	20.2878	20.1325
8	21.3132	20.8902	21.0615	20.8963	19.5286	19.6169	19.57	19.436
10	18.9247	19.0752	18.9033	18.902	18.7825	18.8515	18.9469
12	19.0996	19.2233	19.2298	19.017	19.0636	19.0513	19.3639	19.0683
16	19.9509	20.0472	19.9625	20.1735	19.1106	18.8446	18.8243	19.0724
20	19.0453	18.6655	18.8786	18.654	18.8201	18.8882	18.8373	18.9451

## Sheet: Fig2-fig.supp3
LUCIFERASE ASSAY
		Relative light units (RLU)
Treatment	Fraction #	Rep 1	Rep 2	Rep 3
Rspo only	NA	1030	960	780
F7L6-sc	unfractionated sample	29290	29460	35650
F7L6-sc	1	760	610	950
F7L6-sc	2	750	520	560
F7L6-sc	3	710	980	870
F7L6-sc	4	1770	1800	1910
F7L6-sc	5	5411	3871	3341
F7L6-sc	6	8964	9044	10920
F7L6-sc	7	18880	21300	18610
F7L6-sc	8	35580	40190	42640
F7L6-sc	9	40020	34730	32300
F7L6-sc	10	32820	33820	35510
F7L6-sc	11	5111	4741	6032
F7L6-sc	12	670	880	1050
F7L6-sc	13	1130	630	570
F7L6-sc	14	710	560	840
F7L6	unfractionated sample	68380	80340	79250
F7L6	1	6942	5902	6432
F7L6	2	21510	16440	11440
F7L6	3	16340	13200	21480
F7L6	4	19670	24850	21770
F7L6	5	59200	52960	55830
F7L6	6	82520	69360	60830
F7L6	7	55340	62030	75710
F7L6	8	34410	46350	39110
F7L6	9	7413	8694	6192
F7L6	10	3441	2440	2020
F7L6	11	2340	2830	2760
F7L6	12	2190	2210	2350
F7L6	13	1060	1370	1490
F7L6	14	1240	1410	1190
