# Supplementary material for: Selective activation of FZD7 promotes mesendodermal differentiation of human pluripotent stem cells
Source: eLife. 2020 Dec 17;9:e63060. doi: 10.7554/eLife.63060 (PMC7759383; doi:10.7554/eLife.63060)
Supplement: Figure 3—figure supplement 2—source data 1. [file elife-63060-fig3-figsupp2-data1.xlsx]

## Sheet: Fig3-fig.supp2
SOX17 expression in H1
		SOX17 Cq
		Experiment 1			Experiment 2
Treatment	Hours	Rep 1	Rep 2	Rep 3	Rep 1	Rep 2	Rep 3
DMSO	48	31.0298	30.9497	31.0807	31.525	31.7733	31.6728
F7L6	24	30.3431	30.6008	30.4978	30.4869	30.7573	30.7106
F7L6	48	23.9702	24.0249	24.01	23.7117	23.8457	23.8629
Wnt3a	24	28.5259	28.6659	28.654	29.2089	29.2412	29.272
Wnt3a	48	23.2764	23.3319	23.3501	23.4486	23.3883	23.402
CHIR	24	30.826	30.7831	31.0302	31.0873	31.0816	30.932
CHIR	48	31.2294	31.3627	31.3243	32.1517	31.9519	32.0443
		RPL13A Cq (loading control)
		Experiment 1			Experiment 2
Treatment	Hours	Rep 1	Rep 2	Rep 3	Rep 1	Rep 2	Rep 3
DMSO	48	20.0716	20.1323	20.0747	20.0716	20.1323	20.0747
F7L6	24	19.6334	19.9171	19.7986	19.6334	19.9171	19.7986
F7L6	48	19.8517	19.8043	19.904	19.8517	19.8043	19.904
Wnt3a	24	19.7153	19.9012	19.773	19.7153	19.9012	19.773
Wnt3a	48	19.7143	19.7077	19.836	19.7143	19.7077	19.836
CHIR	24	19.7175	19.8923	19.6594	19.7175	19.8923	19.6594
CHIR	48	19.8083	19.9028	19.743	19.8083	19.9028	19.743
FOXA2 expression in H1
		FOXA2 Cq
		Experiment 1			Experiment 2
Treatment	Hours	Rep 1	Rep 2	Rep 3	Rep 1	Rep 2	Rep 3
DMSO	48	35.7065	34.1854	35.3814	35.5645	34.3007	34.7309
F7L6	24	28.1587	28.2462	28.3098	28.8184	28.7871	28.7979
F7L6	48	27.6307	27.6453	27.3971	27.5097	27.7547	27.9233
Wnt3a	24	27.8797	28.0744	27.7993	28.6147	28.4788	28.612
Wnt3a	48	27.5163	27.7536	27.7138	27.7044	28.1321	27.9764
CHIR	24	32.4624	32.2679	33.0905	33.1128	32.2318	32.8394
CHIR	48	37.616	32.177	36.6661	39.7707	38.0615	32.8504
		RPL13A Cq (loading control)
		Experiment 1			Experiment 2
Treatment	Hours	Rep 1	Rep 2	Rep 3	Rep 1	Rep 2	Rep 3
DMSO	48	20.0716	20.1323	20.0747	20.0716	20.1323	20.0747
F7L6	24	19.6334	19.9171	19.7986	19.6334	19.9171	19.7986
F7L6	48	19.8517	19.8043	19.904	19.8517	19.8043	19.904
Wnt3a	24	19.7153	19.9012	19.773	19.7153	19.9012	19.773
Wnt3a	48	19.7143	19.7077	19.836	19.7143	19.7077	19.836
CHIR	24	19.7175	19.8923	19.6594	19.7175	19.8923	19.6594
CHIR	48	19.8083	19.9028	19.743	19.8083	19.9028	19.743
