# Supplementary material for: Selective activation of FZD7 promotes mesendodermal differentiation of human pluripotent stem cells
Source: eLife. 2020 Dec 17;9:e63060. doi: 10.7554/eLife.63060 (PMC7759383; doi:10.7554/eLife.63060)
Supplement: Figure 5—source data 1. [file elife-63060-fig5-data1.xlsx]

## Sheet: Fig.5C
AXIN2 expression in H1
	AXIN2 Cq
	Experiment 1						Experiment 2
Hours	F7L6			Wnt3a			F7L6			Wnt3a
	Rep 1	Rep 2	Rep 3	Rep 1	Rep 2	Rep 3	Rep 1	Rep 2	Rep 3	Rep 1	Rep 2	Rep 3
0	27.8111	27.9826	27.8377	27.8111	27.9826	27.8377	28.6861	28.6994	28.848	28.6861	28.6994	28.848
1	27.406	27.446	27.5032	27.7666	27.654	27.4287	27.8478	27.6938	27.7045	27.3295	27.708	27.9111
2	27.1399	27.0184	27.0953	26.7292	26.9699	26.9445	27.1283	27.0186	27.2391	27.6159	27.4316	27.7441
3	26.2857	26.4516	26.4941	26.4832	26.2727	26.2613	26.3154	26.7083	26.8105	26.216	26.1738	26.3089
4	29.3006	29.3488	29.2008	26.9922	26.8702	26.5876	26.5865	26.478	26.7684	26.2483	26.8677	26.1796
5	26.3375	26.2623	26.1581	26.7065	26.8789	26.7411	26.6393	26.61	26.6755	26.3629	26.4324	26.4076
6	26.5315	26.4673	26.1149	26.6396	26.567	26.7383	26.9173	26.9007	27.2054	26.6806	26.6236	26.9497
	RPL13A Cq (loading control)
	Experiment 1						Experiment 2
nM	F7L6			Wnt3a			F7L6			Wnt3a
	Rep 1	Rep 2	Rep 3	Rep 1	Rep 2	Rep 3	Rep 1	Rep 2	Rep 3	Rep 1	Rep 2	Rep 3
0	20.0263	20.0994	20.015	20.0263	20.0994	20.015	20.4608	20.4816	20.556	20.4608	20.4816	20.556
1	19.4944	19.3762	19.5025	20.2367	20.2339	20.3376	19.7746	19.7803	19.9262	19.8802	19.8483	20.1866
2	19.7547	19.9173	19.9673	20.0875	20.0349	19.9187	19.7769	20.0653	19.9913	20.1298	20.3493	21.0656
3	19.6322	19.5244	19.6308	19.6995	20.1247	19.7991	20.0963	20.112	20.3027	19.6973	19.6361	20.3908
4	23.0406	23.0405	23.0172	20.0053	20.0723	19.9454	20.042	20.1695	20.1206	19.8471	20.0649	20.5007
5	19.1843	19.2243	19.4816	19.7849	19.9104	19.9495	19.6913	20.0996	20.0352	19.7115	19.9949	20.2832
6	19.382	19.3891	19.2507	19.8238	19.7591	19.8283	20.2641	20.7057	20.3295	20.0268	20.0267	20.1277

## Sheet: Fig.5D
SOX9 expression in H1
	SOX9 Cq
	Experiment 1						Experiment 2
Hours	F7L6			Wnt3a			F7L6			Wnt3a
	Rep 1	Rep 2	Rep 3	Rep 1	Rep 2	Rep 3	Rep 1	Rep 2	Rep 3	Rep 1	Rep 2	Rep 3
0	28.2365	28.3922	28.2681	28.2365	28.3922	28.2681	28.7957	29.0039	28.5438	28.7957	29.0039	28.5438
1	28.8868	28.6976	28.9241	28.766	28.2893	28.7108	28.9491	29.1912	29.2299	29.5345	29.6656	29.3302
2	28.0879	28.136	28.1317	28.5105	28.604	28.861	28.1054	28.3433	28.328	29.2865	29.3679	29.35
3	27.8483	27.6472	27.7401	28.198	28.179	28.1458	28.4318	28.3303	28.3357	29.0902	28.743	29.0646
4	27.9989	27.9339	27.8947	28.3341	28.3618	28.3462	28.4296	28.417	28.4406	28.5413	28.9759	28.9048
5	28.2248	28.1014	28.1652	28.719	28.7422	28.7079	28.4479	28.365	28.5178	28.768	29.0534	29.1454
6	28.6908	28.5367	28.4498	28.2903	28.3928	28.439	28.9353	29.0411	29.2363	29.1867	29.4603	29.2539
	RPL13A Cq (loading control)
	Experiment 1						Experiment 2
nM	F7L6			Wnt3a			F7L6			Wnt3a
	Rep 1	Rep 2	Rep 3	Rep 1	Rep 2	Rep 3	Rep 1	Rep 2	Rep 3	Rep 1	Rep 2	Rep 3
0	19.9764	20.0588	19.9672	19.9764	20.0588	19.9672	20.256	20.2683	20.4172	20.256	20.2683	20.4172
1	20.1331	20.1582	20.3477	20.2647	20.3518	20.3724	19.4526	19.4313	20.2504	20.5116	20.5325	20.6049
2	20.1	20.1261	20.1858	20.3618	20.1928	20.2503	20.4275	19.8051	20.4589	20.6035	20.5968	20.6396
3	20.2031	20.2786	20.1752	20.3566	20.2823	20.2313	20.3456	20.2423	20.2103	21.2279	21.3193	21.2516
4	20.6247	20.3555	20.6241	20.0822	20.1239	20.2503	20.7824	20.6419	20.7241	20.8148	20.7123	20.7791
5	20.3756	20.446	20.4918	20.292	20.1659	20.3407	20.9268	20.962	21.0286	20.6089	20.7557	21.4328
6	20.3804	20.3245	20.3158	20.102	19.9636	20.0913	20.6691	20.7773	20.9015	20.5259	20.4972	20.4955

## Sheet: Fig.5E
ARL4A expression in H1
	ARL4A Cq
	Experiment 1						Experiment 2
Hours	F7L6			Wnt3a			F7L6			Wnt3a
	Rep 1	Rep 2	Rep 3	Rep 1	Rep 2	Rep 3	Rep 1	Rep 2	Rep 3	Rep 1	Rep 2	Rep 3
0	28.1521	28.1555	28.3145	28.1521	28.1555	28.3145	28.1663	27.803	28.4295	28.1663	27.803	28.4295
1	28.3222	28.2954	28.4806	28.2671	28.0019	28.0853	28.1977	28.1315	28.2862	28.2118	28.0439	28.0951
2	27.3012	27.2136	27.4151	27.2366	27.1783	27.2529	27.3673	27.237	27.4153	27.2908	27.4954	27.4193
3	27.3053	27.2243	27.3749	27.0415	27.0199	27.0047	27.1115	27.005	27.2566	27.5125	27.3121	27.351
4	27.3936	27.3811	28.0043	27.2105	27.2364	27.3021	27.4038	27.4905	27.3777	27.1545	27.3337	27.2312
5	27.3953	27.5621	27.6573	27.2293	27.5629	27.1382	27.2274	27.3684	27.6812	27.823	27.3056	27.2978
6	27.3706	27.5611	27.5343	27.1617	27.1699	27.0901	27.8982	27.7331	28.016	27.536	27.4879	27.4079
	RPL13A Cq (loading control)
	Experiment 1						Experiment 2
nM	F7L6			Wnt3a			F7L6			Wnt3a
	Rep 1	Rep 2	Rep 3	Rep 1	Rep 2	Rep 3	Rep 1	Rep 2	Rep 3	Rep 1	Rep 2	Rep 3
0	19.9764	20.0588	19.9672	19.9764	20.0588	19.9672	20.256	20.2683	20.4172	20.256	20.2683	20.4172
1	20.1331	20.1582	20.3477	20.2647	20.3518	20.3724	19.4526	19.4313	20.2504	20.5116	20.5325	20.6049
2	20.1	20.1261	20.1858	20.3618	20.1928	20.2503	20.4275	19.8051	20.4589	20.6035	20.5968	20.6396
3	20.2031	20.2786	20.1752	20.3566	20.2823	20.2313	20.3456	20.2423	20.2103	21.2279	21.3193	21.2516
4	20.6247	20.3555	20.6241	20.0822	20.1239	20.2503	20.7824	20.6419	20.7241	20.8148	20.7123	20.7791
5	20.3756	20.446	20.4918	20.292	20.1659	20.3407	20.9268	20.962	21.0286	20.6089	20.7557	21.4328
6	20.3804	20.3245	20.3158	20.102	19.9636	20.0913	20.6691	20.7773	20.9015	20.5259	20.4972	20.4955

## Sheet: Fig.5F
NKX1-2 expression in H1
	NKX1-2 Cq
	Experiment 1						Experiment 2
Hours	F7L6			Wnt3a			F7L6			Wnt3a
	Rep 1	Rep 2	Rep 3	Rep 1	Rep 2	Rep 3	Rep 1	Rep 2	Rep 3	Rep 1	Rep 2	Rep 3
0	25.179	25.2346	25.1901	25.179	25.2346	25.1901	25.8312	25.8206	25.9955	25.8312	25.8206	25.9955
1	24.3416	26.1722	26.254	26.042	25.579	25.6248	26.3536	26.29	26.2621	26.7009	26.5608	26.6161
2	25.3737	25.431	25.5512	25.3445	25.4362	25.494	25.3485	25.6304	25.6267	26.2172	26.0439	26.1109
3	25.0301	24.9886	25.04	24.8828	24.8384	24.9869	24.8331	24.8441	24.898	25.13	25.1058	25.3029
4	24.3416	24.4024	24.4397	24.5287	24.3595	24.4558	24.1321	24.1865	24.2764	24.1987	24.291	24.1791
5	23.8515	23.7717	23.8431	23.6329	23.7641	23.7872	23.9946	23.8362	23.8867	23.6767	23.8936	23.9575
6	23.8952	23.8902	23.8093	23.4413	23.2211	23.3681	23.9619	23.9173	23.9193	23.5826	23.5518	23.7769
	RPL13A Cq (loading control)
	Experiment 1						Experiment 2
nM	F7L6			Wnt3a			F7L6			Wnt3a
	Rep 1	Rep 2	Rep 3	Rep 1	Rep 2	Rep 3	Rep 1	Rep 2	Rep 3	Rep 1	Rep 2	Rep 3
0	19.9764	20.0588	19.9672	19.9764	20.0588	19.9672	20.256	20.2683	20.4172	20.256	20.2683	20.4172
1	20.1331	20.1582	20.3477	20.2647	20.3518	20.3724	19.4526	19.4313	20.2504	20.5116	20.5325	20.6049
2	20.1	20.1261	20.1858	20.3618	20.1928	20.2503	20.4275	19.8051	20.4589	20.6035	20.5968	20.6396
3	20.2031	20.2786	20.1752	20.3566	20.2823	20.2313	20.3456	20.2423	20.2103	21.2279	21.3193	21.2516
4	20.6247	20.3555	20.6241	20.0822	20.1239	20.2503	20.7824	20.6419	20.7241	20.8148	20.7123	20.7791
5	20.3756	20.446	20.4918	20.292	20.1659	20.3407	20.9268	20.962	21.0286	20.6089	20.7557	21.4328
6	20.3804	20.3245	20.3158	20.102	19.9636	20.0913	20.6691	20.7773	20.9015	20.5259	20.4972	20.4955

## Sheet: Fig.5G
NKD1 expression in H1
	NKD1 Cq
	Experiment 1						Experiment 2
Hours	F7L6			Wnt3a			F7L6			Wnt3a
	Rep 1	Rep 2	Rep 3	Rep 1	Rep 2	Rep 3	Rep 1	Rep 2	Rep 3	Rep 1	Rep 2	Rep 3
0	31.4437	31.8586	31.4558	31.4437	31.8586	31.4558	32.0238	31.5334	31.5673	32.0238	31.5334	31.5673
1	32.1168	32.1695	32.0713	31.7332	31.421	31.9492	32.0227	31.1367	31.5223	31.0206	31.2464	31.8415
2	31.0698	31.1269	31.3949	31.6658	31.6654	31.616	31.5639	31.6157	30.8253	31.5243	32.1748	32.0955
3	31.1058	30.6382	30.4989	30.6013	30.7216	30.8181	29.309	29.6083	29.6217	30.1225	30.5628	30.1392
4	30.2121	30.0068	30.3188	30.0888	30.2053	30.3524	29.363	29.4756	29.461	29.5002	29.4739	29.4372
5	29.4393	29.5174	29.6328	29.5012	29.6388	29.3586	29.3876	29.3105	29.3163	29.0991	29.4659	29.0093
6	29.6943	29.2483	29.8638	29.1311	28.356	29.0474	29.5217	29.4753	29.5558	29.1614	29.2371	29.0602
	RPL13A Cq (loading control)
	Experiment 1						Experiment 2
nM	F7L6			Wnt3a			F7L6			Wnt3a
	Rep 1	Rep 2	Rep 3	Rep 1	Rep 2	Rep 3	Rep 1	Rep 2	Rep 3	Rep 1	Rep 2	Rep 3
0	19.9764	20.0588	19.9672	19.9764	20.0588	19.9672	20.256	20.2683	20.4172	20.256	20.2683	20.4172
1	20.1331	20.1582	20.3477	20.2647	20.3518	20.3724	19.4526	19.4313	20.2504	20.5116	20.5325	20.6049
2	20.1	20.1261	20.1858	20.3618	20.1928	20.2503	20.4275	19.8051	20.4589	20.6035	20.5968	20.6396
3	20.2031	20.2786	20.1752	20.3566	20.2823	20.2313	20.3456	20.2423	20.2103	21.2279	21.3193	21.2516
4	20.6247	20.3555	20.6241	20.0822	20.1239	20.2503	20.7824	20.6419	20.7241	20.8148	20.7123	20.7791
5	20.3756	20.446	20.4918	20.292	20.1659	20.3407	20.9268	20.962	21.0286	20.6089	20.7557	21.4328
6	20.3804	20.3245	20.3158	20.102	19.9636	20.0913	20.6691	20.7773	20.9015	20.5259	20.4972	20.4955

## Sheet: Fig.5H
FGF18 expression in H1
	FGF18 Cq
	Experiment 1						Experiment 2
Hours	F7L6			Wnt3a			F7L6			Wnt3a
	Rep 1	Rep 2	Rep 3	Rep 1	Rep 2	Rep 3	Rep 1	Rep 2	Rep 3	Rep 1	Rep 2	Rep 3
0	32.5052	33.2556	33.0737	32.5052	33.2556	33.0737	32.7808	33.2809	33.0204	32.7808	33.2809	33.0204
1	33.2035	33.0812	32.7488	33.0014	32.4866	33.3072	33.6108	33.7557	32.6677	33.3703	33.2051	33.288
2	33.2822	33.1217	33.0149	32.7273	33.0922	32.7282	33.1209	32.7813	33.4268	33.2077	33.2704	33.1028
3	33.3336	32.537	32.4851	31.4535	31.3017	31.541	32.3965	32.4198	32.1516	32.1153	32.2633	32.0591
4	32.0025	32.1921	31.9291	31.7718	31.9597	32.2412	31.5575	31.6418	32.0242	31.2476	31.7208	31.0278
5	31.6324	31.5126	31.2927	30.9216	31.0941	31.136	31.7882	31.5735	31.4894	31.0598	31.0235	31.2954
6	31.6509	31.5676	31.4387	30.0601	30.0496	30.0214	31.636	31.9465	31.7746	31.2183	30.6883	30.1895
	RPL13A Cq (loading control)
	Experiment 1						Experiment 2
nM	F7L6			Wnt3a			F7L6			Wnt3a
	Rep 1	Rep 2	Rep 3	Rep 1	Rep 2	Rep 3	Rep 1	Rep 2	Rep 3	Rep 1	Rep 2	Rep 3
0	19.9764	20.0588	19.9672	19.9764	20.0588	19.9672	20.256	20.2683	20.4172	20.256	20.2683	20.4172
1	20.1331	20.1582	20.3477	20.2647	20.3518	20.3724	19.4526	19.4313	20.2504	20.5116	20.5325	20.6049
2	20.1	20.1261	20.1858	20.3618	20.1928	20.2503	20.4275	19.8051	20.4589	20.6035	20.5968	20.6396
3	20.2031	20.2786	20.1752	20.3566	20.2823	20.2313	20.3456	20.2423	20.2103	21.2279	21.3193	21.2516
4	20.6247	20.3555	20.6241	20.0822	20.1239	20.2503	20.7824	20.6419	20.7241	20.8148	20.7123	20.7791
5	20.3756	20.446	20.4918	20.292	20.1659	20.3407	20.9268	20.962	21.0286	20.6089	20.7557	21.4328
6	20.3804	20.3245	20.3158	20.102	19.9636	20.0913	20.6691	20.7773	20.9015	20.5259	20.4972	20.4955
