# Supplementary material for: Selective activation of FZD7 promotes mesendodermal differentiation of human pluripotent stem cells
Source: eLife. 2020 Dec 17;9:e63060. doi: 10.7554/eLife.63060 (PMC7759383; doi:10.7554/eLife.63060)
Supplement: Figure 7—source data 1. [file elife-63060-fig7-data1.xlsx]

## Sheet: Fig.7B
			Ct values
Primers	Cell line	Treatment	Rep 1	Rep 2	Rep 3	Rep 4
RPL13A	H1	Undifferentiated	20.7242	20.659	21.3569	21.0101
RPL13A	H1	Wnt Buffer	21.5043	21.3453	21.7554	21.3847
RPL13A	H1	5nM Wnt3a	21.337	21.3521	21.5725	21.2471
RPL13A	H1	5nM F7L6	22.0611	21.6781	21.9974	21.7205
POU5F1	H1	Undifferentiated	30.2476	30.0217	30.433	30.0937
POU5F1	H1	Wnt Buffer	30.3702	30.4739	30.7937	30.9142
POU5F1	H1	5nM Wnt3a	32.3308	32.5518	32.0053	32.5765
POU5F1	H1	5nM F7L6	35.8025	35.4839	36.9712	34.7295
SOX17	H1	Undifferentiated	32.7103	32.2511	32.3284	32.595
SOX17	H1	Wnt Buffer	27.4804	27.6375	27.7615	27.3041
SOX17	H1	5nM Wnt3a	23.7041	23.5937	23.9609	23.8015
SOX17	H1	5nM F7L6	24.2425	24.212	24.2524	24.1201
CXCR4	H1	Undifferentiated	32.4095	32.3115	32.7368	32.033
CXCR4	H1	Wnt Buffer	28.4595	28.4491	28.4877	28.1925
CXCR4	H1	5nM Wnt3a	23.5725	23.6293	23.691	23.4867
CXCR4	H1	5nM F7L6	24.4894	24.3996	24.4058	24.3356
FOXA2	H1	Undifferentiated	38.367	36.4714	36.6054
FOXA2	H1	Wnt Buffer	32.8234	32.9897	33.222	32.6557
FOXA2	H1	5nM Wnt3a	29.0932	29.1322	29.1312	28.7883
FOXA2	H1	5nM F7L6	29.1425	28.9264	29.0193	28.8645
