# Supplementary material for: Selective activation of FZD7 promotes mesendodermal differentiation of human pluripotent stem cells
Source: eLife. 2020 Dec 17;9:e63060. doi: 10.7554/eLife.63060 (PMC7759383; doi:10.7554/eLife.63060)
Supplement: Figure 8—source data 1. [file elife-63060-fig8-data1.xlsx]

## Sheet: Fig. 8B
Percentage of CD34+/CD45+ cells in a human hematopoietic stem and progenitor cell (HSPC) differentiation.
Treatment	Rep 1	Rep 2	Rep 3
Buffer	34.1	32.6	34
F7L6	0.38	0	0.058
Wnt3a	16	14.8	6.23

## Sheet: Fig. 8C
Percentage of CD34+ cells in a human hematopoietic stem and progenitor cell (HSPC) differentiation.
Treatment	Rep 1	Rep 2	Rep 3
Buffer	66.7	61.8	64
F7L6	4.61	7.73	5.05
Wnt3a	30.2	28.9	21.5

## Sheet: Fig. 8D
Percentage of CD45+ cells in a human hematopoietic stem and progenitor cell (HSPC) differentiation.
Treatment	Rep 1	Rep 2	Rep 3
Buffer	46.8	54.4	48.6
F7L6	0.61	0.27	0.17
Wnt3a	54	58.5	40.6

## Sheet: Fig. 8E
MESP1 expression
	MESP1 Cq					GAPDH Cq (loading control)
Treatment	Rep 1	Rep 2	Rep 3		Treatment	Rep 1	Rep 2	Rep 3
Buffer	34.7994	31.9673	33.6016		Buffer	25.3456	19.8853	18.855
F7L6	32.9657	31.7501	32.0269		F7L6	18.5081	17.92	18.5182
Wnt3a	33.5002	37.4566	36.9319		Wnt3a	20.1039	26.47	25.6194
MIXL1 expression
	MIXL1 Cq					GAPDH Cq (loading control)
Treatment	Rep 1	Rep 2	Rep 3		Treatment	Rep 1	Rep 2	Rep 3
Buffer	35.783	34.1566	34.3725		Buffer	25.7282	19.6932	21.4284
F7L6	36.7371	33.4331	36.64		F7L6	18.2894	20.8182	19.19
Wnt3a	34.1655	38.1175	36.8669		Wnt3a	19.2607	26.8126	26.0871
KDR expression
	KDR Cq					GAPDH Cq (loading control)
Treatment	Rep 1	Rep 2	Rep 3		Treatment	Rep 1	Rep 2	Rep 3
Buffer	35.1739	36.1803	34.8228		Buffer	24.4288	25.0566	25.4119
F7L6	36.1392	34.0248	37.4593		F7L6	25.5996	24.1971	26.3033
Wnt3a	36.2055	36.0937	35.9227		Wnt3a	28.7642	24.6356	25.5053
