# Supplementary material for: Selective activation of FZD7 promotes mesendodermal differentiation of human pluripotent stem cells
Source: eLife journal article supplement (doi:10.7554/elife.63060), 2020-12-17
Supplement: supp [file elife-63060-supp-v1.zip]

| Amino acid # | Domain                             |
|--------------|------------------------------------|
| 2-21         | Ig kappa chain signal peptide      |
| 22-27        | His tag                            |
| 28-148       | Heavy chain variable anti-FZD7     |
| 149-163      | GS linker                          |
| 164-270      | Light chain variable anti-FZD7     |
| 271-284      | GS linker                          |
| 285-392      | Light chain variable anti-LRP6 Bp3 |
| 393-412      | GS linker                          |
| 413-531      | Heavy chain variable anti-LRP6 Bp3 |
| 532-762      | Human IgG1 Fc                      |

```

1  METDTLLLWV LLLWVPGSTG DHHHHHHGGEV QLVESGGGLV QPKGSLKLSC
51  AASGFTFNTY AMHWVRQAPG KGLEWVARIR SKSNNYAKNY DDSVKDRFTI
101 SRDDSQSMLY LQMNNLKTED TAMYICVREN YGGRFDYWGQ GTLVTVSSGG
151 GSGGGGSGGG GGSIVMTQS PKSMSMSVGE RVTLRCKASE NVLNYVSWYQ
201 QKPEQSPKLL IYGASNRYTG VPDRFTGSGS ATDFTLTISS VQAEDLADYH
251 CGQSYRYPTF GAGTKLELKY GGGGSGGGGS GGGGDIVLTQ SPATLSLSPG
301 ERATLSCRAS QFIGSRYLAW YQKPGQAPR LLIYGASNRA TGVPARFSGS
351 GSGTDFTLTI SSLEPEDFAT YYCQQYYDYP QTFGQGTKVE IKGGGGSGGG
401 GSGGGGSGGG GSQVQLKESG PALVKPTQTL TLTCTFSGFS LSNRGGGVGW
451 IRQPPGKALE WLAWIDWDDD KSYSTSLKTR LTISKDTSKN QVVLTMNMD
501 PVDATATYYCA RFHLPLVFDS WGQGTSLTVS SMVRSDKTHT CPPCPAPELL
551 GGPSVFLFPP KPKDTLMISR TPEVTCVVVD VSHEDPEVKF NWYVDGVEVH
601 NAKTKPREEQ YNSTYRVVSV LTVLHQDWLN GKEYKCKVSN KALPAPIEKT
651 ISKAKGQPRE PQVYTLPPSR EEMTKNQVSL TCLVKGFYPS DIAVEWESNG
701 QPENNYKTPP PVLDSGDSFF LYSKLTVDKS RWQQGNVFSC SVMHEALHNH
751 YTQKSLSLSP GK

```
