# Supplementary figures and images for: Selective activation of FZD7 promotes mesendodermal differentiation of human pluripotent stem cells
Source: eLife journal article supplement (doi:10.7554/elife.63060), 2020-12-17

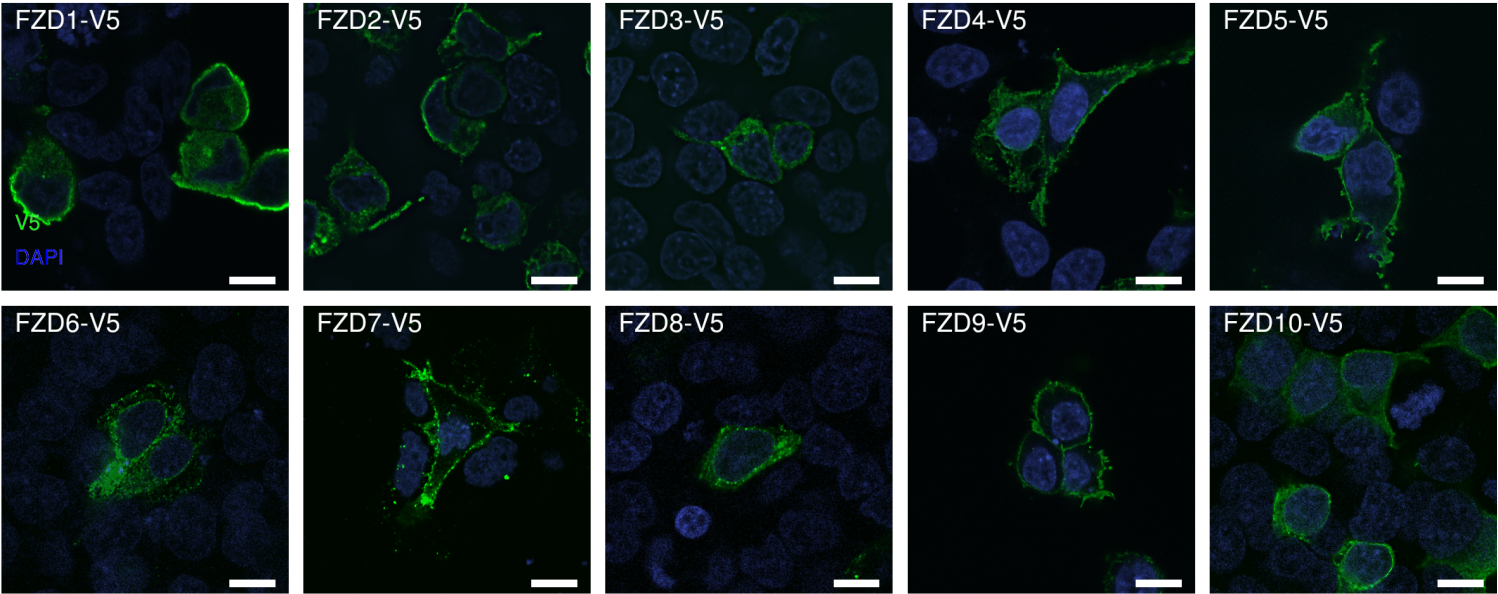

Supplement: supp [file elife-63060-supp-v1.zip]

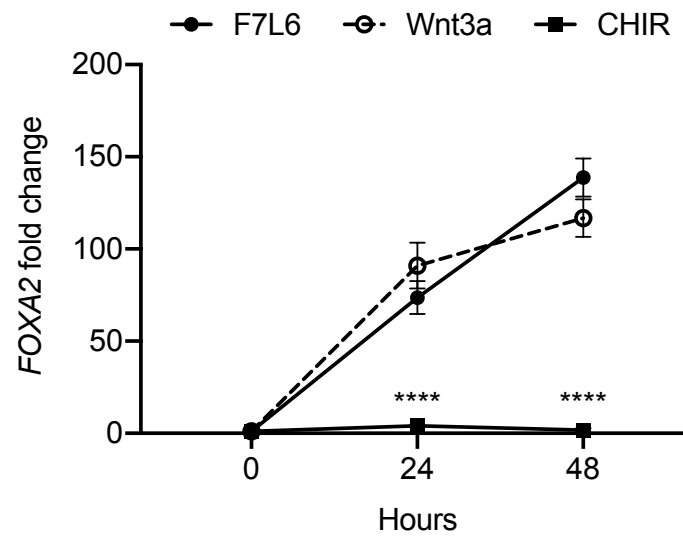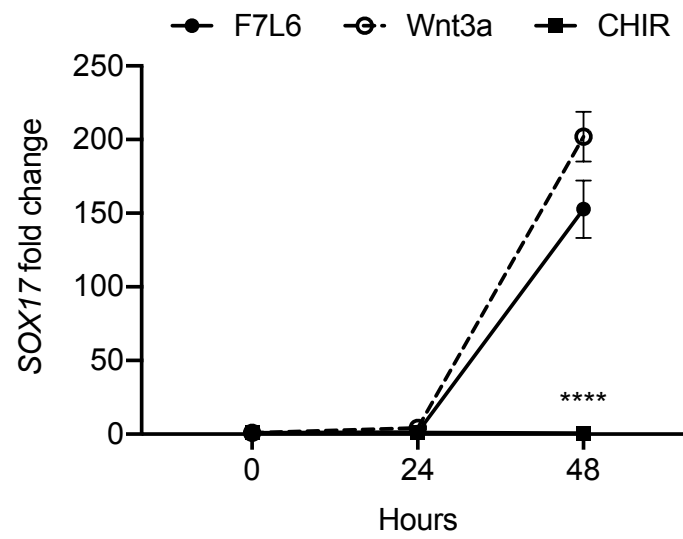

Supplement: supp [file elife-63060-supp-v1.zip]

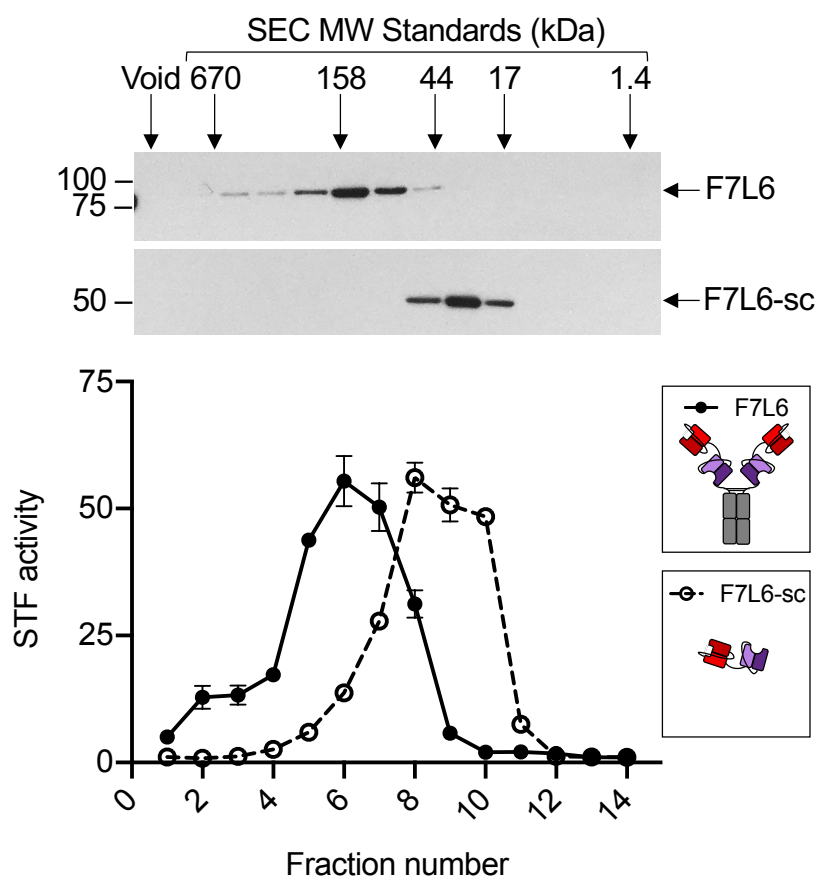

Supplement: supp [file elife-63060-supp-v1.zip]

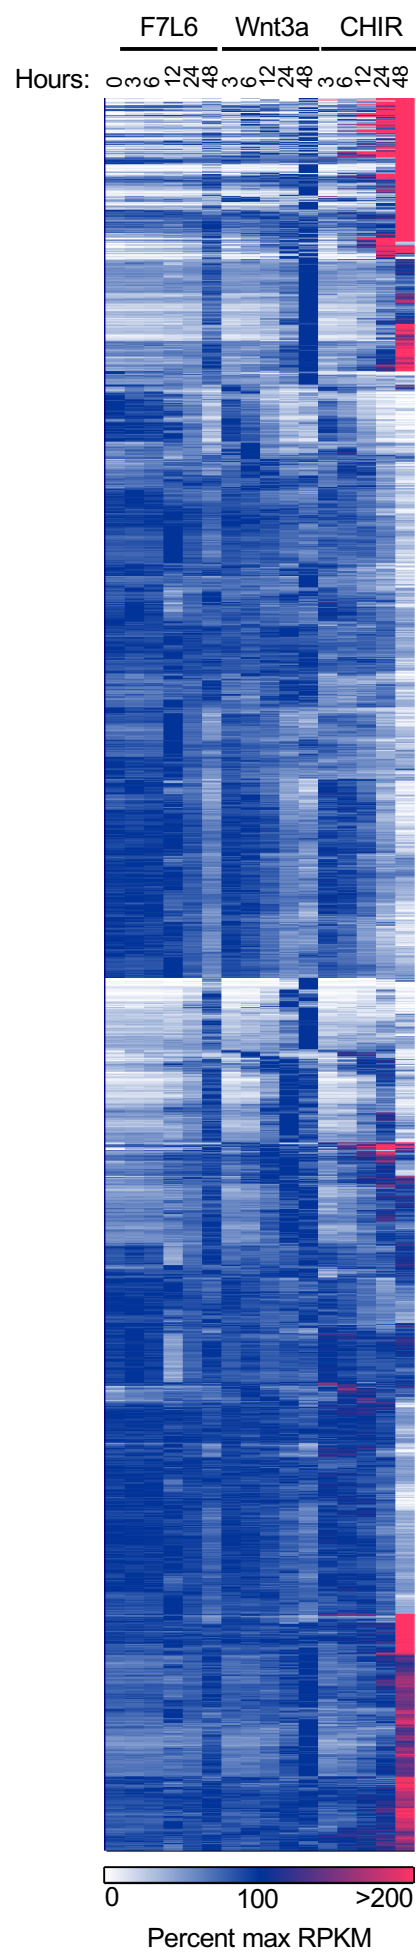

Supplement: supp [file elife-63060-supp-v1.zip]

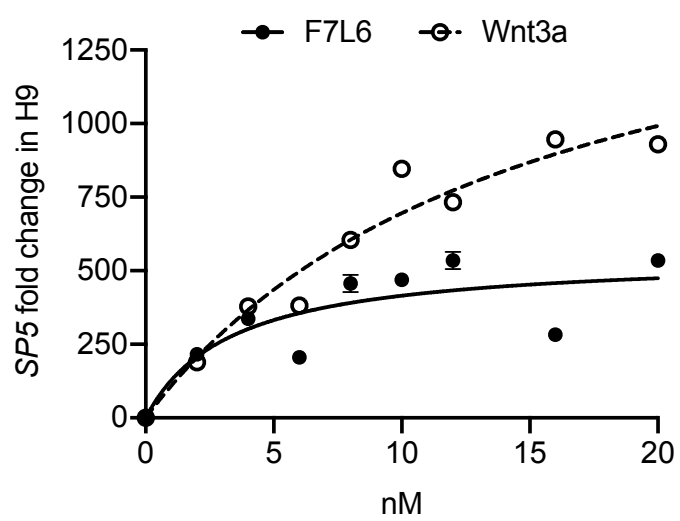

Supplement: supp [file elife-63060-supp-v1.zip]

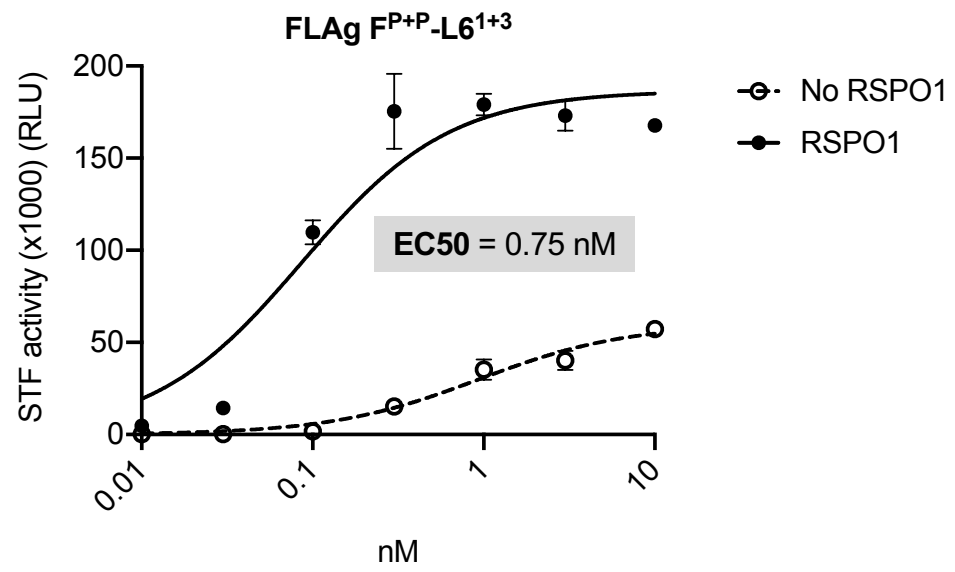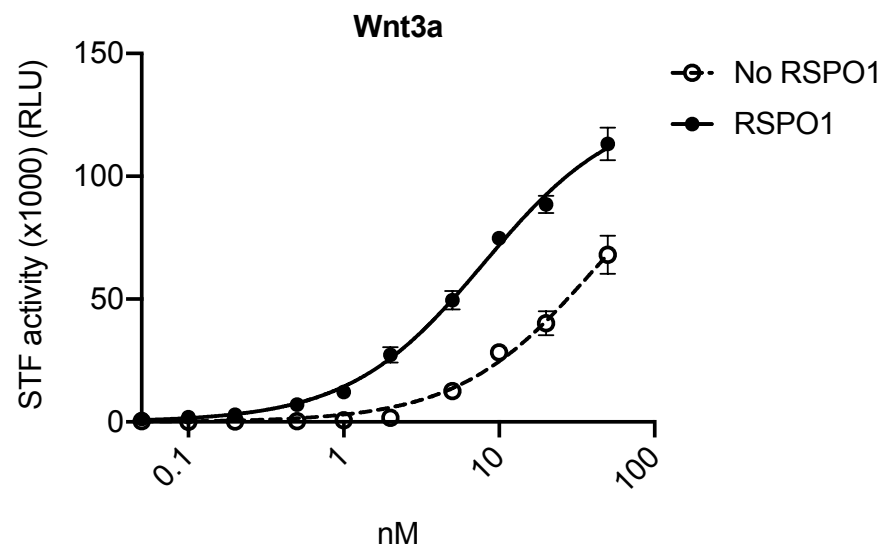

Supplement: supp [file elife-63060-supp-v1.zip]
